# Supplementary material for: Genome-wide detection of human variants that disrupt intronic branchpoints
Source: PubMed Central journal article supplement (PMC9636908; doi:10.1073/pnas.2211194119), 2022-10-28
Supplement: pnas.2211194119.sd06.pdf [file pnas.2211194119.sd06.pdf]

## BPHunter: Negative BP Reporting

\* We genuinely require all submitters to take responsibility for the submitted data.

\* Please name your report as: "BPHunter\_Neg\_Rep\_MM\_DD\_YYYY\_LASTNAME.docx", where "MM\_DD\_YYYY" is the date.

\* The submitters should be aware of that the collected results will be analyzed for future research, if we receive enough.

Submission Date (MM/DD/YYYY)

### Submitter's Information

Prefix:

First Name:

Last Name:

Institutional Email:

Academic Position:

Laboratory:

Principle Investigator:

Institution:

City, State:

Country:

### Variant Information

*\*add rows if more variants to be submitted*

Reference Genome (GRCh37/GRCh38):

Number of Variants:

| Gene | CHROM | POS | REF | ALT | Type<br>(snv, del, ins) | Zygosity<br>(hom, het,<br>hemi) | BP Name<br>(given by<br>BPHunter) | Hit position<br>(-2, -1, 0, all) |
|------|-------|-----|-----|-----|-------------------------|---------------------------------|-----------------------------------|----------------------------------|
|      |       |     |     |     |                         |                                 |                                   |                                  |
|      |       |     |     |     |                         |                                 |                                   |                                  |
|      |       |     |     |     |                         |                                 |                                   |                                  |
|      |       |     |     |     |                         |                                 |                                   |                                  |
|      |       |     |     |     |                         |                                 |                                   |                                  |
|      |       |     |     |     |                         |                                 |                                   |                                  |
|      |       |     |     |     |                         |                                 |                                   |                                  |
|      |       |     |     |     |                         |                                 |                                   |                                  |

### Experimental Information

*\* attach the supporting evidence (figures and descriptions) starting from the next page*

Cell Type:

Assay Type:

## **Supporting Evidence**
